# Supplementary material for: Short oligopeptides with three cysteine residues as models of sulphur-rich Cu(i)- and Hg(ii)-binding sites in proteins
Source: Royal Society of Chemistry journal article supplement (doi:10.1039/c8mt00113h), 2018-01-01
Supplement: c8mt00113h1.pdf [file c8mt00113h1.pdf]

## Supplementary Information

### **Short oligopeptides with three cysteine residues as models of sulphur-rich Cu(I)- and Hg(II)-binding sites in proteins**

Edit Mesterhazy,<sup>a,b</sup> Colette Lebrun,<sup>a</sup> Serge Crouzy,<sup>c</sup> Attila Jancso,<sup>b\*</sup> Pascale Delangle<sup>a\*</sup>

<sup>a</sup> INAC/SYMMES/Université Grenoble Alpes, CEA, CNRS, 38000 Grenoble, France

<sup>b</sup> Department of Inorganic and Analytical Chemistry, University of Szeged, Dóm tér 7, Szeged  
H-6720, Hungary

<sup>c</sup> BIG/LCBM/Université Grenoble Alpes, CEA, CNRS, (UMR 5249), 38000 Grenoble, France

**Table S1.** Analytical HPLC and (+)ESI-MS references of the peptides

| Name                  | $t_r$ (min) | Chemical formula                                                               | Molecular weight (g/mol) | m/z $[M+2H]^{2+}$ | m/z $[M+H]^+$ |
|-----------------------|-------------|--------------------------------------------------------------------------------|--------------------------|-------------------|---------------|
| <b>P<sup>3C</sup></b> | 10.1        | C <sub>34</sub> H <sub>57</sub> N <sub>13</sub> O <sub>13</sub> S <sub>3</sub> | 951.34                   | 476.8             | 952.4         |
| <b>1<sup>C</sup></b>  | 10.7        | C <sub>34</sub> H <sub>57</sub> N <sub>13</sub> O <sub>13</sub> S <sub>3</sub> | 951.34                   | 476.8             | 952.3         |
| <b>1<sup>L</sup></b>  | 10.5        | C <sub>36</sub> H <sub>62</sub> N <sub>14</sub> O <sub>14</sub> S <sub>3</sub> | 1010.37                  | 506.3             | 1011.4        |
| <b>2<sup>C</sup></b>  | 10.9        | C <sub>34</sub> H <sub>57</sub> N <sub>13</sub> O <sub>13</sub> S <sub>3</sub> | 951.34                   | 476.7             | 952.3         |
| <b>2<sup>L</sup></b>  | 10.4        | C <sub>36</sub> H <sub>62</sub> N <sub>14</sub> O <sub>14</sub> S <sub>3</sub> | 1010.37                  | 506.7             | 1011.4        |
| <b>3<sup>C</sup></b>  | 10.8        | C <sub>37</sub> H <sub>62</sub> N <sub>14</sub> O <sub>14</sub> S <sub>3</sub> | 1022.37                  | 512.3             | 1023.3        |

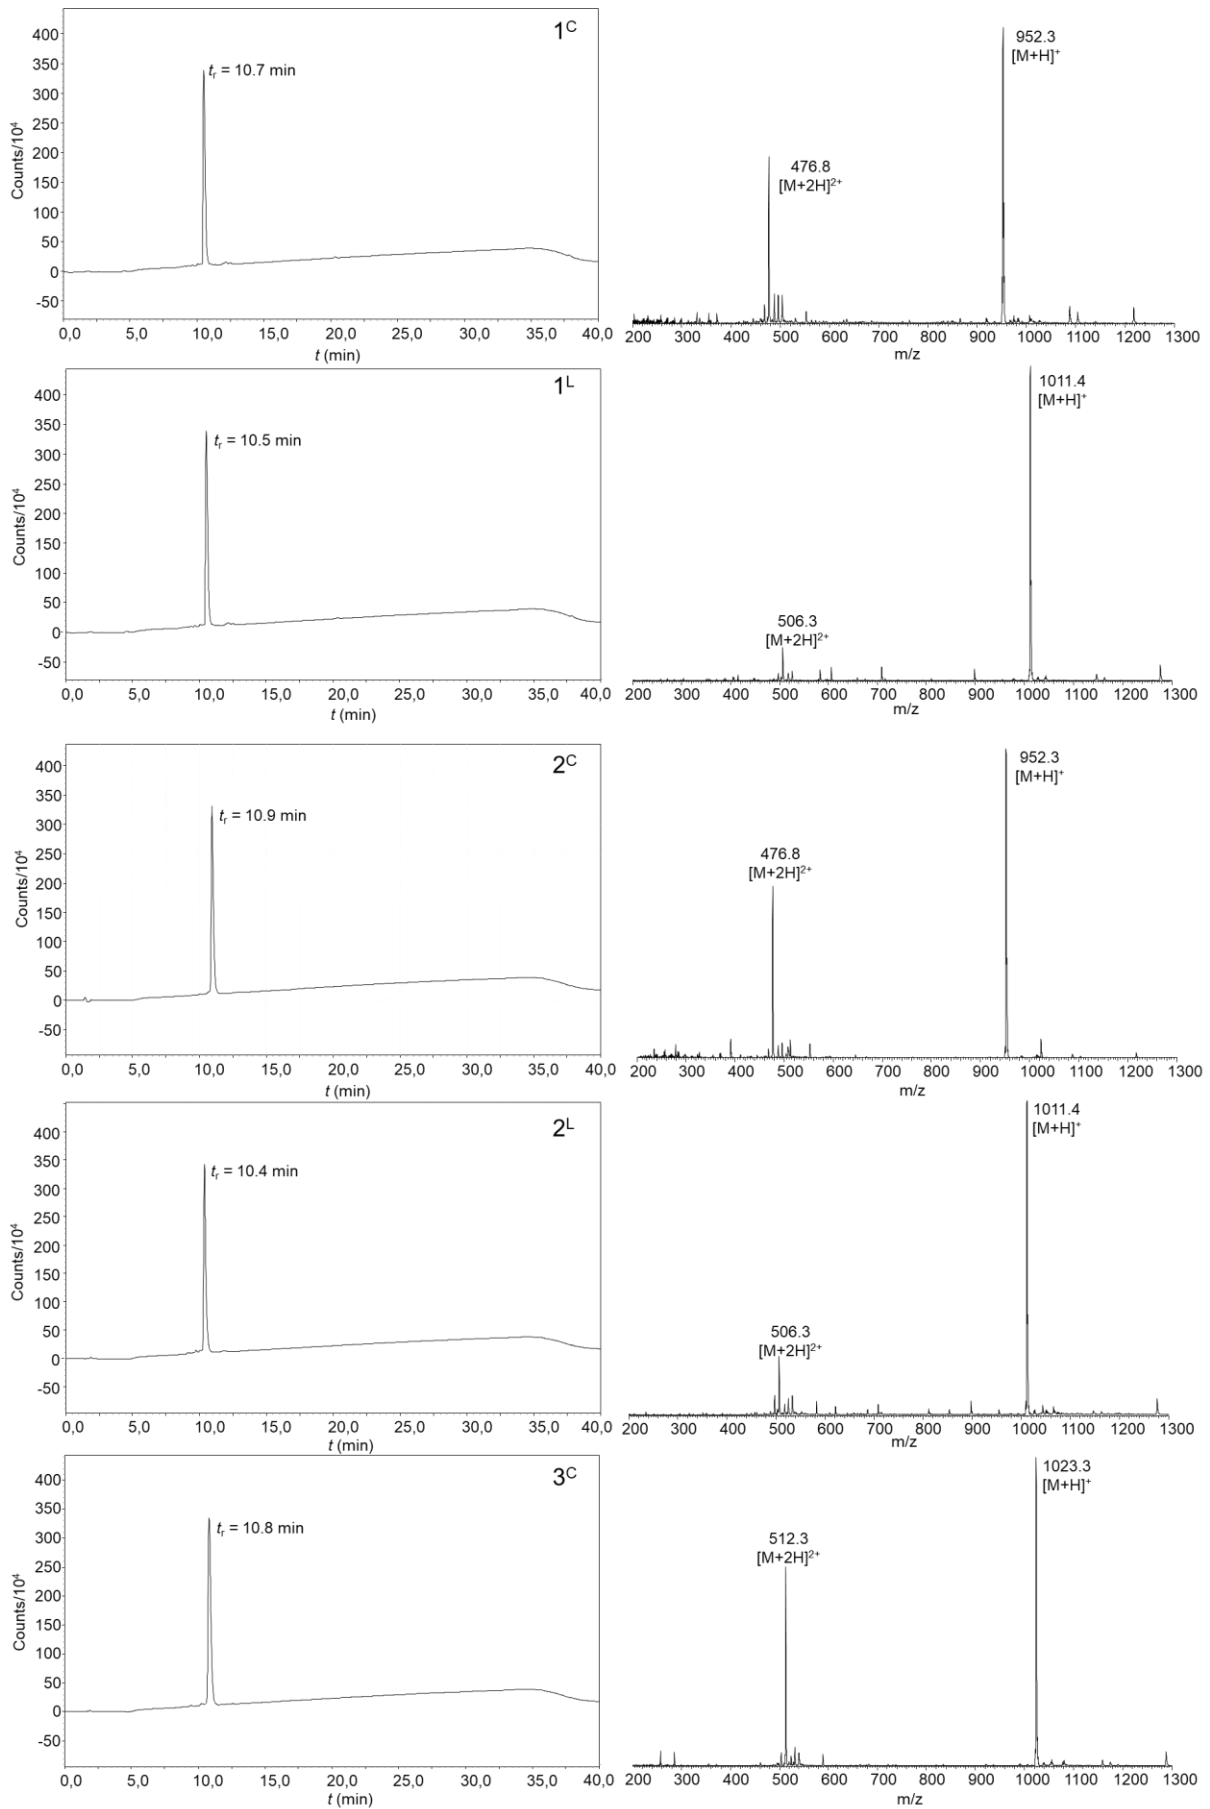

**Figure S1.** Analytical HPLC chromatogram and (+)ESI-MS spectra of the studied peptides

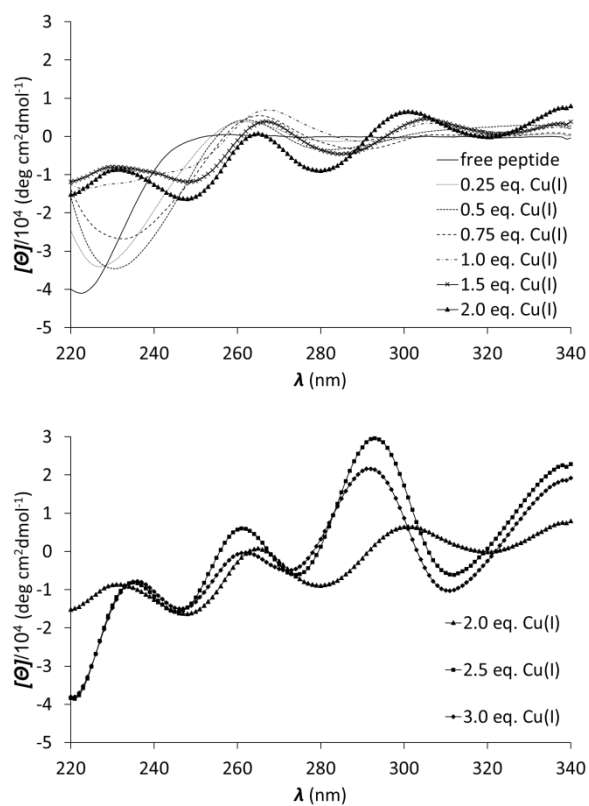

**Figure S2.** CD titration of  $1^C$  with Cu(I) ( $c_{\text{peptide}} = 30 \mu\text{M}$ ) in phosphate buffer 20 mM, pH = 7.4 + 10 V/V% AcN. The upper panel shows the spectra with 0.0-2.0 equivalents of Cu(I) and the lower with 2.0-3.0 equivalents.

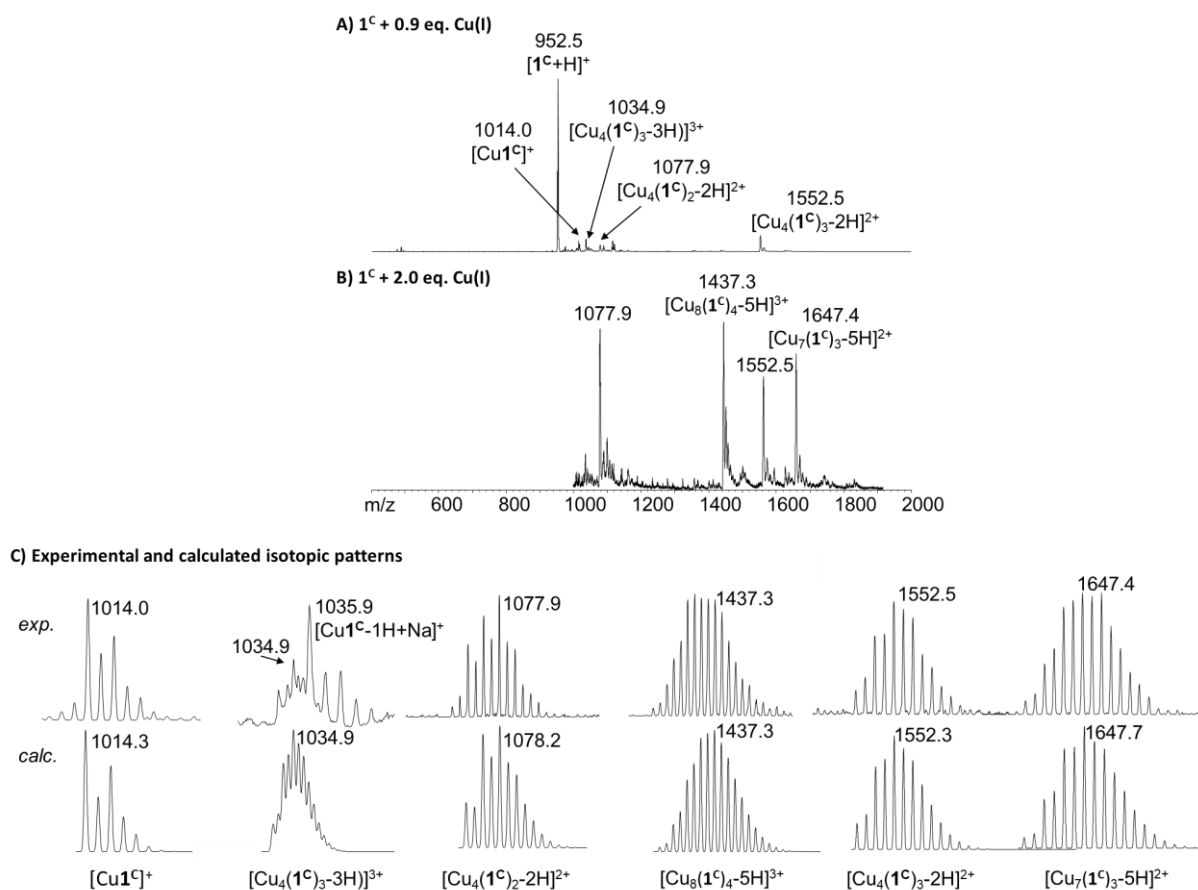

**Figure S3.** (+) ESI-MS spectra recorded for  $1^C$  with Cu(I).  $c_{\text{peptide}} = 100 \mu\text{M}$  in  $\text{NH}_4\text{AcO}$  buffer 20 mM, pH = 7.0 + 10 V/V% AcN. **A)** 0.9 Cu(I) equiv. **B)** 2.0 Cu(I) equiv. **C)** Experimental and calculated isotopic patterns of the main cluster species. The notation  $1^C$  refers here to the neutral free peptide.

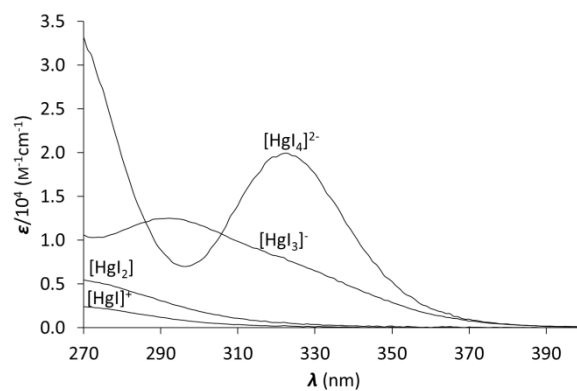

**Figure S4.** Molar spectra of the Hg(II)-I<sup>-</sup> complexes at pH = 2.0 obtained by SPECFIT.

### Calculation of the formation constants of the HgHL and HgL complexes

Thermodynamic formation constants for the mono-protonated and parent Hg(II)-complexes were estimated from the apparent stabilities of the HgP mononuclear complexes determined at pH = 2.0. These calculations involve the stepwise proton dissociation constants ( $K_a^{HL}$ ,  $K_a^{H_2L}$ ,  $K_a^{H_3L}$ ) of the ligands, expressed in a form of the overall formation (association) constant,  $\beta_{H_3L}$ , of the fully protonated peptides:

$$\frac{[H_3L]}{[L][H]^3} = \beta_{H_3L} = \frac{1}{K_a^{HL} \times K_a^{H_2L} \times K_a^{H_3L}} \quad (1)$$

Such data had been determined only for one of the peptides,  $\mathbf{1}^L$ , nevertheless, the same protonation/deprotonation constants were extrapolated for all other studied ligands.

Consequently, the calculations detailed below can be considered as rather precise estimates for the complexes of  $\mathbf{1}^L$  but less reliable predictions for the other five peptides. The deduction leading to the final formulae are as follows:

The apparent stability of the mononuclear complexes at pH = 2.0 is defined as:

$$\beta_{HgP}^{pH2.0} = \frac{[HgP]}{[Hg][P]} \quad (2)$$

Considering that the spectrophotometrically determined  $pK_a$  values, attributed to the release of one equivalent proton from the Hg(II)-bound peptides, span the range of 4.3 – 5.1, a plausible assumption is that the peptides are bound to Hg(II) as mono-protonated ligands (HL) at pH = 2.0 and the equilibrium concentration of the sum of complexed ligand forms, [HgP], can be approximated with the concentration of the HgHL complex, i.e. [HgP] = [HgHL].

Additionally, at pH = 2.0 the concentration of the free peptide, [P], can be substituted with that of the fully protonated ligand, [H<sub>3</sub>L]. Above equation is then transformed to:

$$\beta_{HgP}^{pH2.0} = \frac{[HgHL]}{[Hg][H_3L]} \quad (3)$$

[H<sub>3</sub>L] in the above equation can be substituted by

$$[H_3L] = \beta_{H_3L} \times [L] \times [H]^3 \quad (4)$$

and rearranged to

$$\beta_{HgP}^{pH2.0} \times \beta_{H_3L} \times [H]^2 = \frac{[HgHL]}{[Hg][L][H]} \quad (5)$$

Latter equation can be easily combined with the expression of the formation constant of the HgHL complex (6).

$$\beta_{\text{HgHL}} = \frac{[\text{HgHL}]}{[\text{Hg}][\text{L}][\text{H}]} \quad (6)$$

The combination of (5) and (6) leads to an expression allowing the calculation of  $\beta_{\text{HgHL}}$  from the experimentally measured stability data:

$$\beta_{\text{HgHL}} = \beta_{\text{HgP}}^{\text{pH}2.0} \times \beta_{\text{H}_3\text{L}} \times [\text{H}]^2 \quad (7)$$

$$\log\beta_{\text{HgHL}} = \log\beta_{\text{HgP}}^{\text{pH}2.0} + \log\beta_{\text{H}_3\text{L}} - 2 \times \text{pH} \quad (8)$$

Formation constants for the parent HgL complexes can be obtained by using the spectrophotometrically determined deprotonation constants ( $\text{p}K_{\text{a}}^{\text{HgHL}}$ ) for the  $\text{HgHL} \rightleftharpoons \text{HgL} + \text{H}$  process:

$$\log\beta_{\text{HgL}} = \log\beta_{\text{HgHL}} - \text{p}K_{\text{a}}^{\text{HgHL}} \quad (9)$$

From the above thermodynamic stability constants, apparent stabilities of the HgP mono-complexes may be re-calculated for any desired pH values allowing a direct comparison of the Cu(I)- and Hg(II)-binding affinities of the studied peptides.



**Table S2.** Average energies (kcal/mol) of the peptides in their apo or Hg(II)-bound forms measured during the last 40 ns (of 85 ns or more) MD simulations. Internal energy is sum of Bonds + Angles + Dihedrals + Improvers – (Standard deviations in parentheses). The energy differences (holo – apo) correlated to the stability constant  $\beta_{\text{HgP}}$  are also given.

| Peptide            | <b>P<sup>3C</sup></b> | <b>1<sup>C</sup></b> | <b>2<sup>C</sup></b> | <b>3<sup>C</sup> §</b> | <b>1<sup>L</sup></b> | <b>2<sup>L</sup></b> |
|--------------------|-----------------------|----------------------|----------------------|------------------------|----------------------|----------------------|
| <i>E</i> (HgP)     | -186.0<br>(7.0)       | -184.8<br>(6.9)      | -182.3<br>(6.7)      | -202.3<br>(7.0)        | -187.1<br>(7.1)      | -181.3<br>(7.1)      |
| <i>E</i> (P)       | -173.2<br>(7.2)       | -173.4<br>(7.5)      | -170.3<br>(7.0)      | -191.3<br>(7.1)        | -174.0<br>(6.9)      | -171.8<br>(7.2)      |
| $\Delta E$ (HgP-P) | -12.8                 | -11.4                | -12.0                | -11.0                  | -13.1                | -9.5                 |

§The higher total energies calculated for the **3<sup>C</sup>** peptide is a consequence of the larger number of amino acids (11 against 10 for the other peptides).

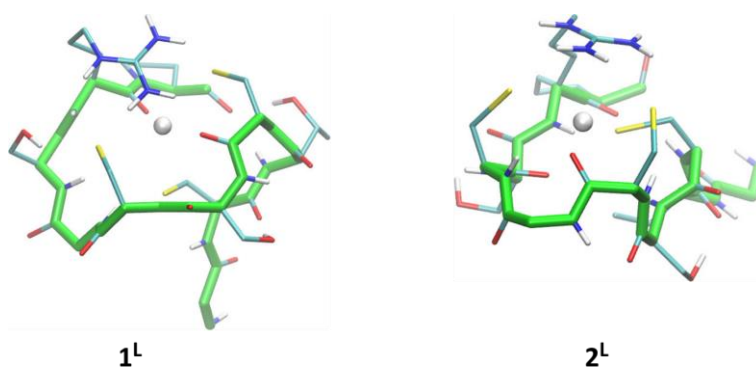

**Figure S5.** Energy minimized structures of the 2 linear peptides in their Hg-bound form. (oriented with respect to the position of backbone atom coordinates of residues 1 to 10)
